# Supplementary material for: Self-assembly of LaF3:Yb,Er/Tm nanoplates into colloidal spheres and tailoring their upconversion emissions with fluorescent dyes
Source: Royal Society of Chemistry journal article supplement (doi:10.1039/c4tc01698j), 2014-01-01
Supplement: c4tc01698j1.pdf [file c4tc01698j1.pdf]

## Supporting Information

### Self-assembly of LaF<sub>3</sub>:Yb,Er/Tm Nanoplates into Colloidal Spheres and Tailoring Their Upconversion Emissions with Fluorescent Dyes

Longyi Bao,<sup>ab</sup> Huiling You,<sup>ab</sup> Limin Wang<sup>c</sup> Lei Li,<sup>a</sup> Ru Qiao,<sup>a</sup> Yong Zhang,<sup>a</sup>  
Yijun Zhong,<sup>a</sup> Yujie Xiong<sup>c</sup> and Zhengquan Li<sup>\*ab</sup>

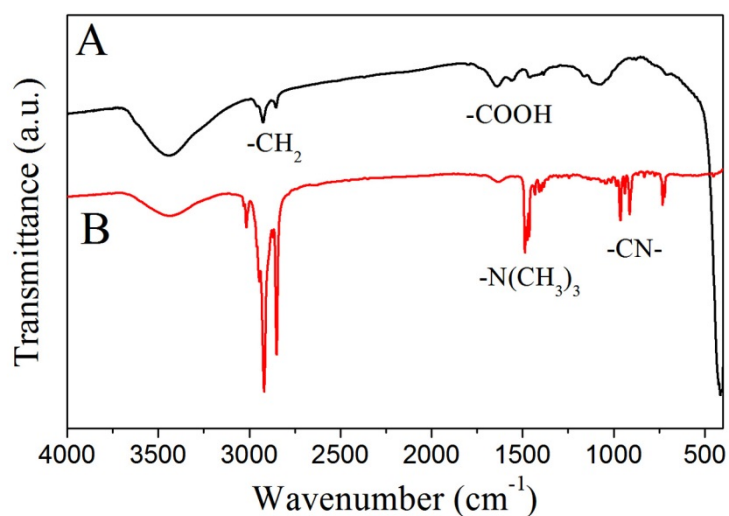

**Fig. S1.** FTIR spectra of (A) the LaF<sub>3</sub> nanoplates and (B) assembled LaF<sub>3</sub> nanoplates with CTAB, namely, the LaF<sub>3</sub> CNCs. Due to the attached OA molecules on surface, stretching peaks of -CH<sub>2</sub> and -COOH can be easily detected on the LaF<sub>3</sub> nanoplates. After these nanoplates were assembled into colloidal spheres with CTAB, stretching peaks from -N(CH<sub>3</sub>)<sub>3</sub> and C-N can also be detected in addition to the peaks from OA molecules. This result clearly shows that many CTAB molecules have been adsorbed on the surface of LaF<sub>3</sub> CNCs after assembly.

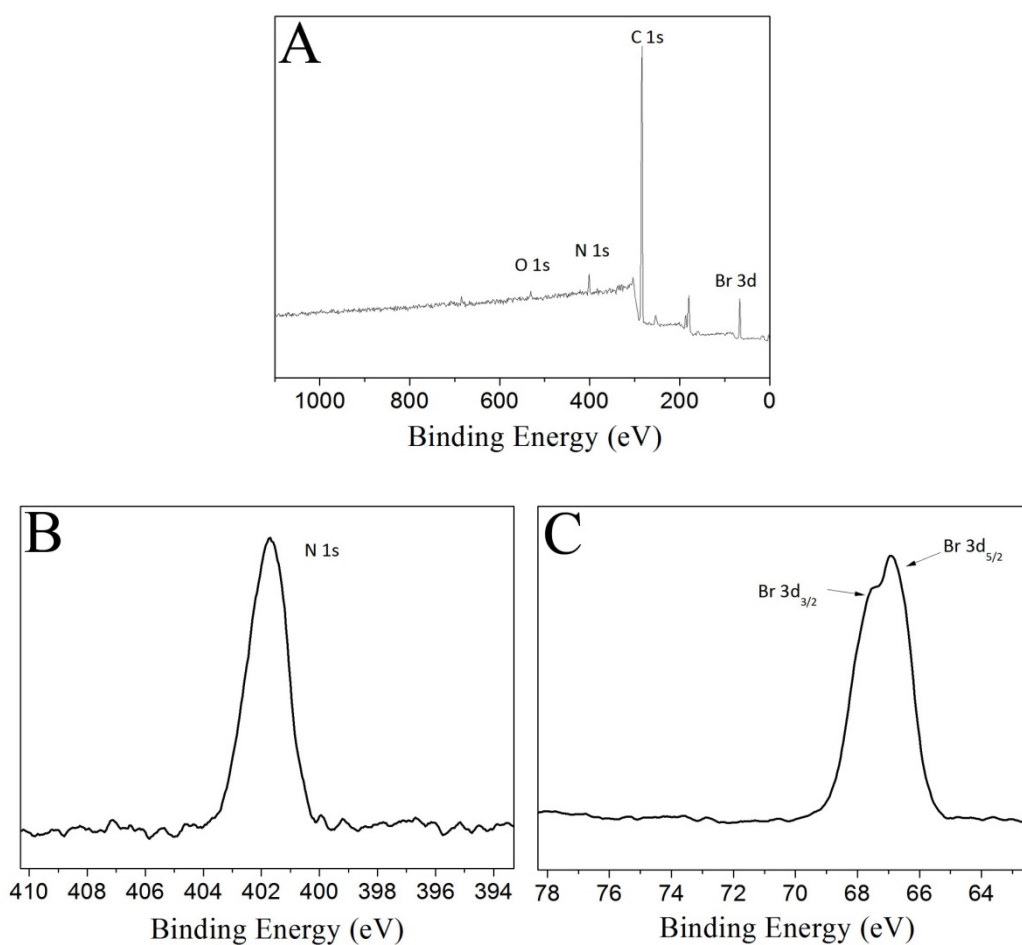

**Fig. S2.** X-ray photoelectron spectroscopy (XPS) analyses of element N and Br in the LaF<sub>3</sub> CNCs: (A) whole spectrum; (B) N 1s; (C) Br 3d. In the synthetic system of LaF<sub>3</sub> CNCs, only CTAB molecules have element N and Br. The XPS data further confirm that some CTAB molecules have been adsorbed on the colloidal spheres.

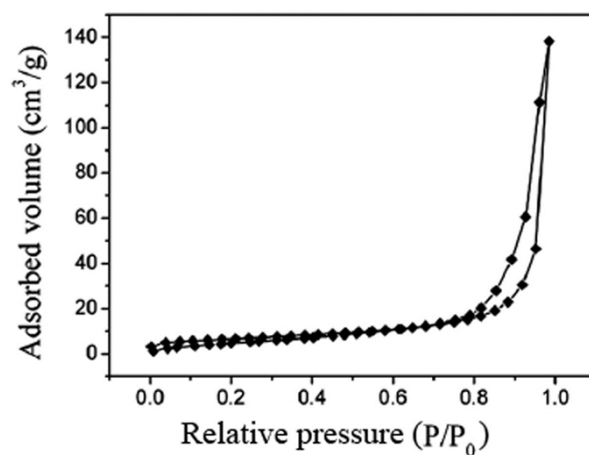

**Fig. S3.** N<sub>2</sub> adsorption-desorption isotherms of the LaF<sub>3</sub> CNCs. This data can be clearly indexed to a typical type-IV isotherm according to the International Union of Pure and Applied Chemistry (IUPAC) nomenclature, confirming the existence of mesoporous pores inside these CNCs.

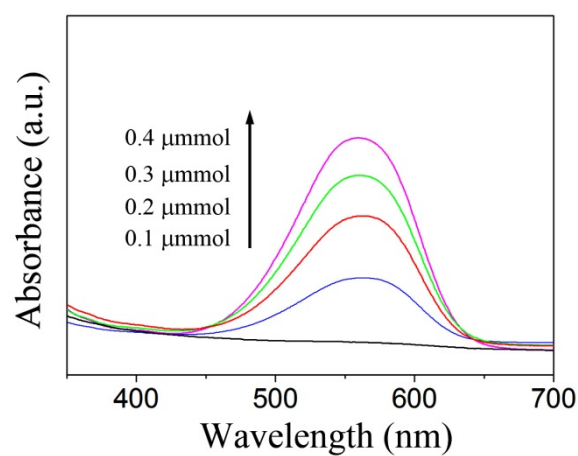

**Fig. S4.** UV-Vis spectra of the LaF<sub>3</sub>:Yb,Er CNCs loaded with different amount of Nile red. The loading concentration of dyes can be measured by UV-Vis spectroscopy and the loading amount of dyes can be reproducibly controlled.
